# Supplementary material for: Fabrication of novel quantum dots for the estimation of COVID-19 antiviral drug using green chemistry: application to real human plasma
Source: Royal Society of Chemistry journal article supplement (doi:10.1039/d2ra02241a), 2022-01-01
Supplement: d2ra02241a1.pdf [file d2ra02241a1.pdf]

**Fabrication of novel quantum dots for the estimation COVID-19 antiviral drug using green chemistry: Application to real human plasma**

Baher I. Salman <sup>a</sup>, Adel Ehab Ibrahim <sup>b,c</sup>, Sami El Deeb <sup>c,d</sup>, Roshdy E. Saraya <sup>b</sup>

<sup>a</sup> Pharmaceutical Analytical Chemistry Department, Faculty of Pharmacy, Al-Azhar University, Assiut branch, Assiut, 71524, Egypt, [bahersalman@azhar.edu.eg](mailto:bahersalman@azhar.edu.eg)

<sup>b</sup> Department of Pharmaceutical Analytical Chemistry, Faculty of Pharmacy, Port Said University, Port Said 42511, Egypt.

<sup>c</sup> Natural and Medical Sciences Research Center, University of Nizwa, P.O. Box 33, Sultanate of Oman

<sup>d</sup> Institute of Medicinal and Pharmaceutical Chemistry, Technische Universitaet Braunschweig, 38106 12 Braunschweig, Germany

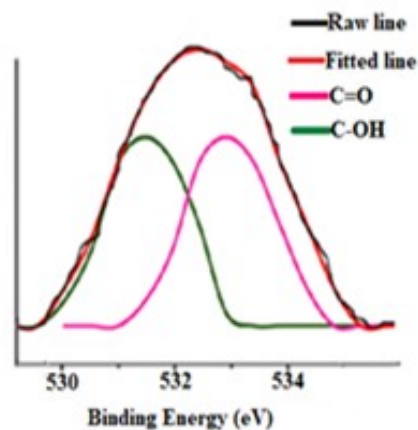

**Fig. S1** XPS spectrum for O1s to structure conformation of PA@CQDs

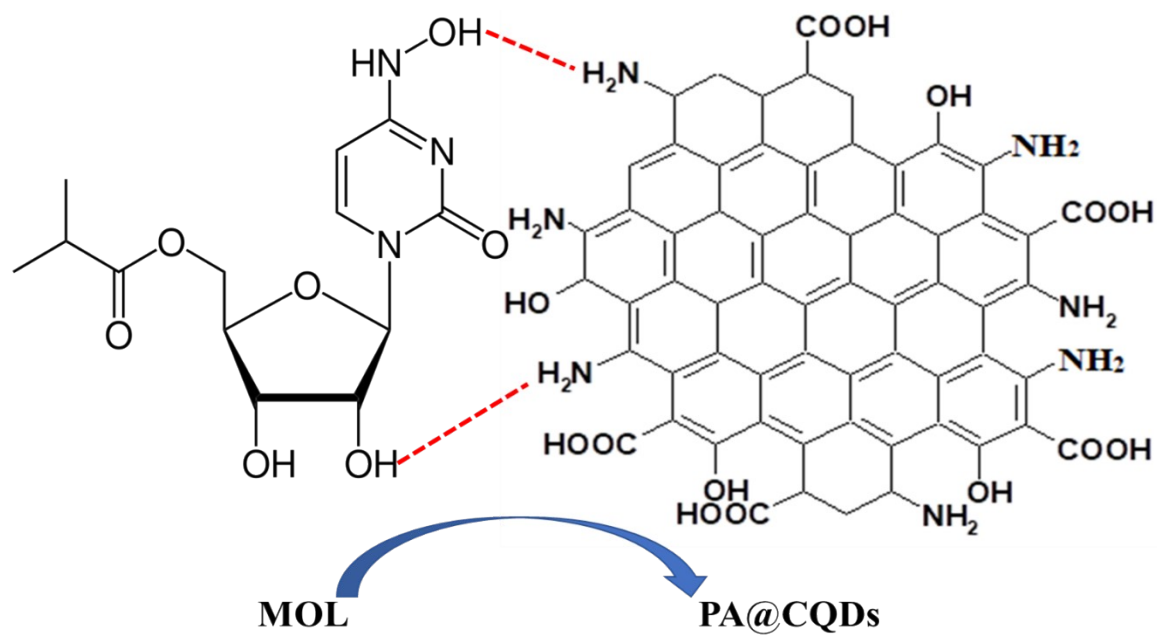

**Fig. S2** Suggested reaction mechanism between MOL and PA@CQDs.

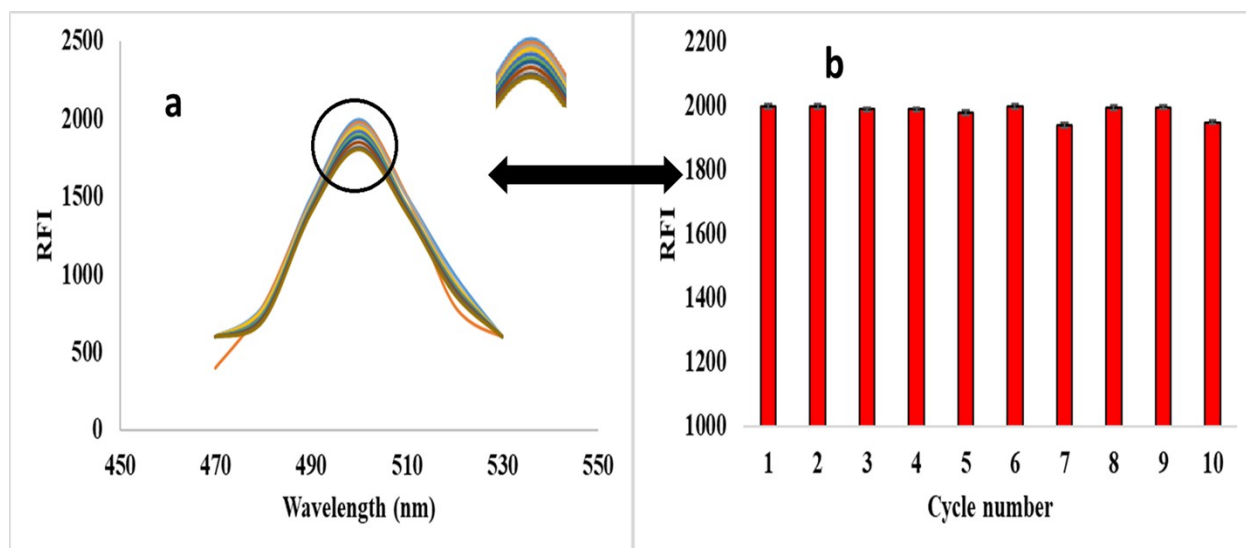

**Fig. S3** Reusability of PA@QDs for estimation MOL in different cycles.

**Table S1** Accuracy and precision of the proposed method for determination of MOL pure form.

| Sample number              | Taken (ng mL <sup>-1</sup> ) | Found (ng mL <sup>-1</sup> ) | % Recovery * ± RSD |
|----------------------------|------------------------------|------------------------------|--------------------|
| 1                          | 5.0                          | 5.03                         | 100.60 ± 0.41      |
| 2                          | 10.0                         | 10.02                        | 100.20 ± 0.59      |
| 3                          | 20.0                         | 19.93                        | 99.65 ± 0.39       |
| 4                          | 50.0                         | 50.21                        | 100.42 ± 0.96      |
| 5                          | 70.0                         | 70.54                        | 100.77 ± 0.71      |
| <b>Intra-day precision</b> | 20                           | 20.10                        | 100.50 ± 0.20      |
|                            | 40                           | 40.02                        | 100.05 ± 0.68      |
|                            | 60                           | 60.32                        | 100.53 ± 0.33      |
| <b>Inter-day precision</b> | 20                           | 19.97                        | 99.85 ± 0.73       |
|                            | 40                           | 39.95                        | 99.87 ± 1.05       |
|                            | 60                           | 60.03                        | 100.05 ± 0.95      |

\*: Average of three determinations. **RSD**: Relative standard deviation.

**Table S2** Accuracy and precision of the proposed method for determining MOL concentration in human plasma.

| Conc.<br>(ng mL <sup>-1</sup> ) | Intra-day assay(n=6)            |                 |                     | Inter-day assay(n=18)           |                 |                     |
|---------------------------------|---------------------------------|-----------------|---------------------|---------------------------------|-----------------|---------------------|
|                                 | Found<br>(ng mL <sup>-1</sup> ) | Accuracy<br>(%) | Precision<br>(CV %) | Found<br>(ng mL <sup>-1</sup> ) | Accuracy<br>(%) | Precision<br>(CV %) |
| 5                               | 4.80                            | 96.00           | 1.60                | 4.75                            | 95.00           | 1.80                |
| 10                              | 9.69                            | 96.90           | 1.93                | 9.53                            | 95.30           | 1.95                |
| 50                              | 47.88                           | 95.76           | 1.32                | 47.49                           | 94.98           | 1.50                |

**Table S3** Robustness of the proposed spectrofluorimetric method for the determination of MOL.

| Variations                                           | % Recovery <sup>a</sup> ± RSD |
|------------------------------------------------------|-------------------------------|
| <b>Optimum condition</b>                             | 101.30 ± 0.44                 |
| <b>1- Value of pH (BR buffer)</b>                    |                               |
| 6                                                    | 99.60 ± 1.06                  |
| 7                                                    | 99.89 ± 1.11                  |
| <b>2- volume of buffer (mL)</b>                      |                               |
| 0.75                                                 | 99.81 ± 0.50                  |
| 1.25                                                 | 99.80 ± 0.91                  |
| <b>3- PA@CQDs concentration (mg mL<sup>-1</sup>)</b> |                               |
| 0.14                                                 | 99.95 ± 0.70                  |
| 0.16                                                 | 99.92 ± 0.64                  |
| <b>4- Reaction time (min)</b>                        |                               |
| 8                                                    | 99.86 ± 1.50                  |
| 12                                                   | 99.97 ± 0.84                  |

<sup>a</sup>: Mean of six determinations.

**Table S4** Stability and matrix effect of MOL in human plasma.

| <b>Conditions</b>                                           |                             |                              |                              |
|-------------------------------------------------------------|-----------------------------|------------------------------|------------------------------|
| <b>Concentrations</b>                                       | <b>LQC</b>                  | <b>MQC</b>                   | <b>HQC</b>                   |
|                                                             | <b>5 ng mL<sup>-1</sup></b> | <b>10 ng mL<sup>-1</sup></b> | <b>50 ng mL<sup>-1</sup></b> |
| Three Freeze–thaw cycle stability (-24°C)                   | 95.00 ± 1.55                | 95.33 ± 1.52                 | 95.16 ± 0.90                 |
| Long-term stability (1 months at -24°C)                     | 94.82 ± 0.91                | 95.52 ± 1.55                 | 96.00 ± 1.43                 |
| Short-term stability (12 h at -24°C)                        | 96.00 ± 1.88                | 97.40 ± 1.11                 | 97.00 ± 0.87                 |
| Post-preparative stability (6 h at room temperature 25 °C)  | 97.13 ± 0.83                | 98.22 ± 1.13                 | 97.96 ± 0.92                 |
| Post-preparative stability (12 h at room temperature 25 °C) | 97.78 ± 0.66                | 97.11 ± 0.52                 | 96.00 ± 1.59                 |

**Table S5** Incurred sample reanalysis for estimation of MOL.

| <b>Sample</b> | <b>Initial concentration* (ng mL<sup>-1</sup>) ± SD</b> | <b>Incurred concentration* (ng mL<sup>-1</sup>) ± SD</b> | <b>% Deviation</b> |
|---------------|---------------------------------------------------------|----------------------------------------------------------|--------------------|
| <b>1</b>      | 926.00 ± 1.79                                           | 890.55 ± 3.51                                            | - 3.88             |
| <b>2</b>      | 930.9 ± 2.11                                            | 895.44 ± 2.58                                            | - 3.80             |
| <b>3</b>      | 925.50 ± 1.88                                           | 878.20 ± 2.69                                            | - 5.11             |

\*: Mean of three determinations

**Table S6.** Effect of different excipients for estimation of MOL using the proposed method.

|                                   | <b>Recovery* ± RSD</b> |
|-----------------------------------|------------------------|
| <b>Mannitol (10 mg)</b>           | 101.11 ± 0.21          |
| <b>Talc (10 mg)</b>               | 100.22 ± 0.42          |
| <b>Starch (100 mg)</b>            | 100.06 ± 0.66          |
| <b>Lactose (10 mg)</b>            | 100.03 ± 0.30          |
| <b>Magnesium stearate (10 mg)</b> | 99.20 ± 0.85           |
| <b>Sodium chloride (10 mg)</b>    | 100.50 ± 0.34          |

\*: Mean of three determinations

**Table S7** Application of the spectrofluorimetric method for determination of MOL in spiked human plasma.

| <b>Added conc.<br/>(ng mL<sup>-1</sup>)</b> | <b>Found<br/>(ng mL<sup>-1</sup>)</b> | <b>% Recovery *± RSD</b> |
|---------------------------------------------|---------------------------------------|--------------------------|
| <b>5</b>                                    | 4.89                                  | 97.80 ± 0.81             |
| <b>10</b>                                   | 9.88                                  | 98.80 ± 0.92             |
| <b>20</b>                                   | 19.42                                 | 97.10 ± 0.84             |
| <b>50</b>                                   | 48.08                                 | 96.16 ± 1.21             |
| <b>70</b>                                   | 68.22                                 | 97.45 ± 1.55             |

\*: Average of six determinations.
